# Supplementary material
Source: PubMed Central journal article supplement (PMC7432962)

**A: CD45.1+ % BM cells**

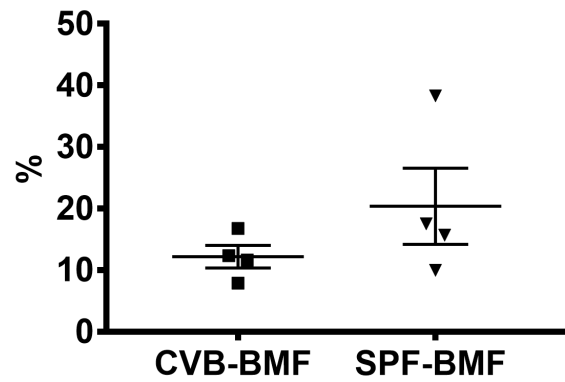

**B: CD45.1+ % SP cells**

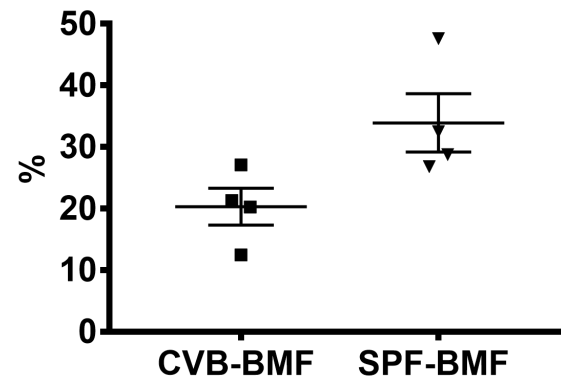

Supplement: NIHMS1064648-supplement-Supp_FigS1.pdf [file NIHMS1064648-supplement-Supp_FigS1.pdf]

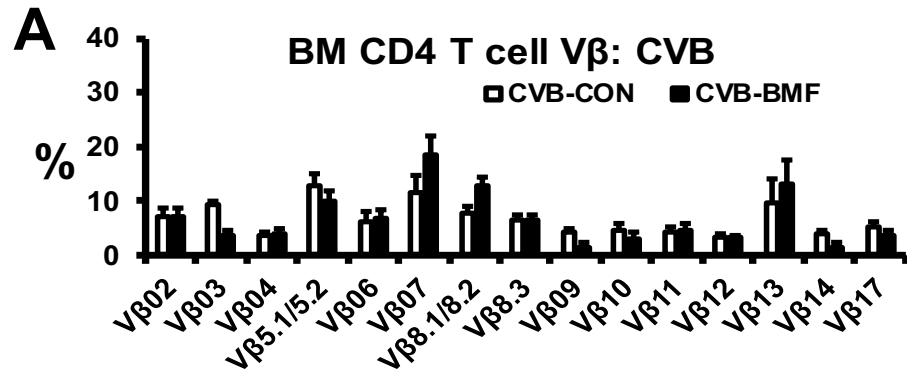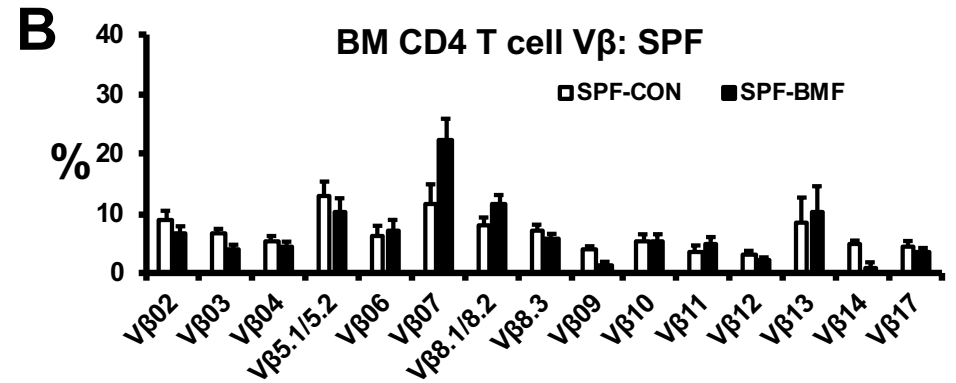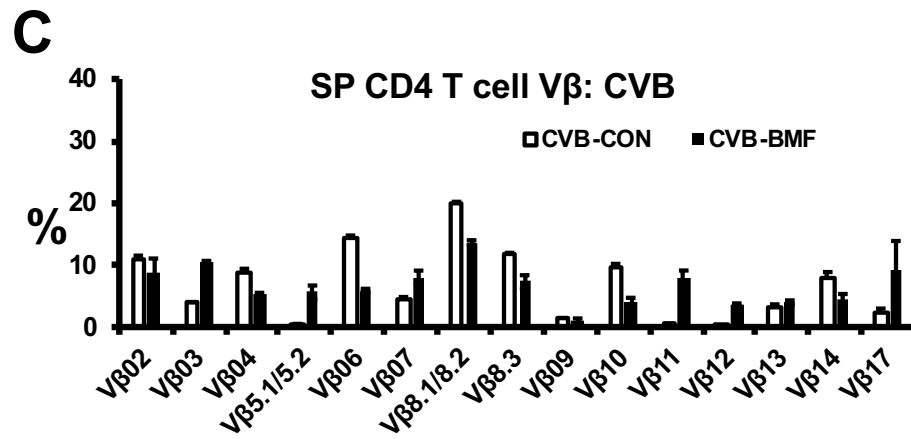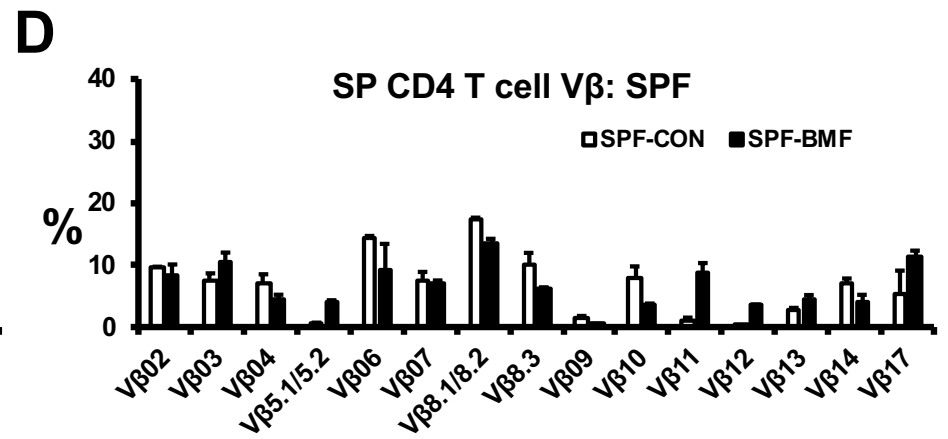

Supplement: NIHMS1064648-supplement-Supp_FigS3.pdf [file NIHMS1064648-supplement-Supp_FigS3.pdf]

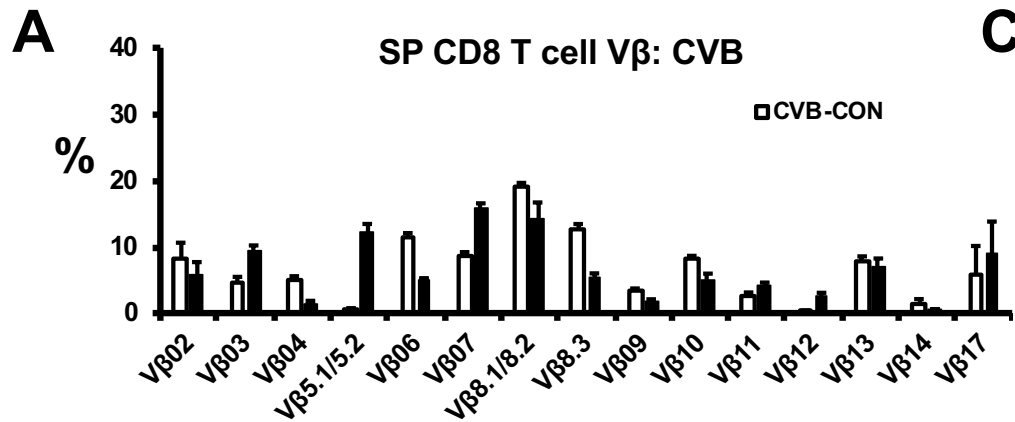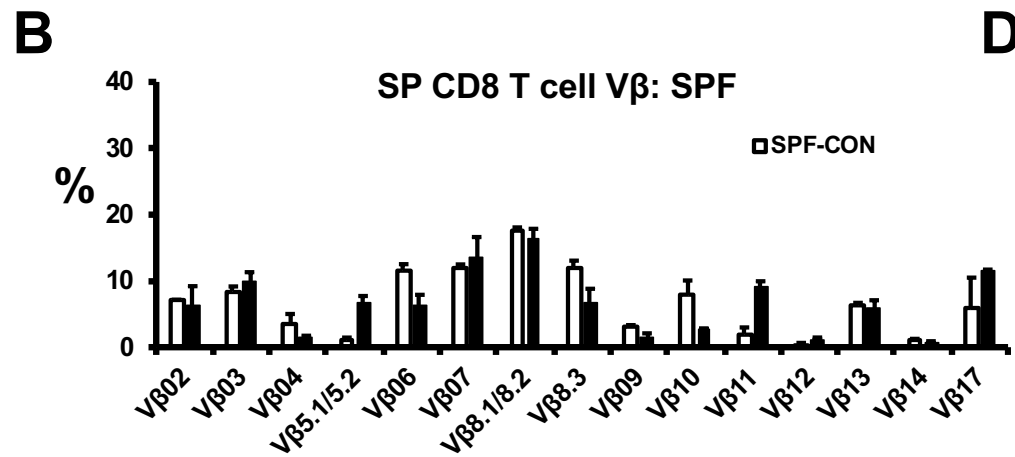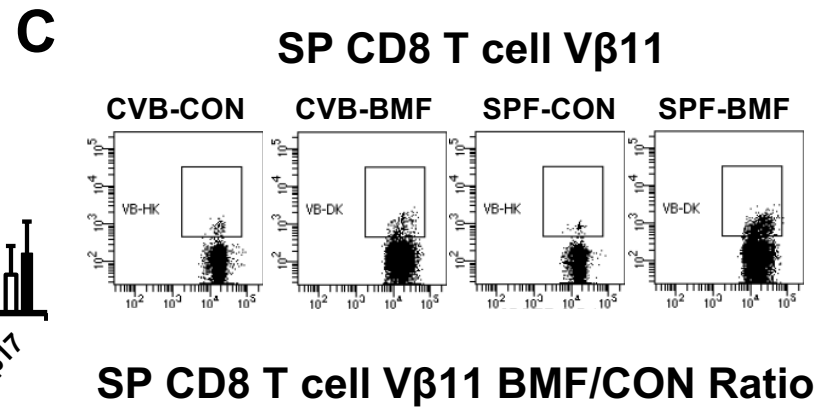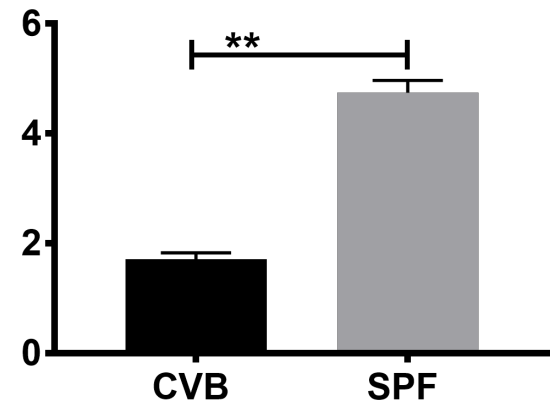

Supplement: NIHMS1064648-supplement-Supp_FigS4.pdf [file NIHMS1064648-supplement-Supp_FigS4.pdf]

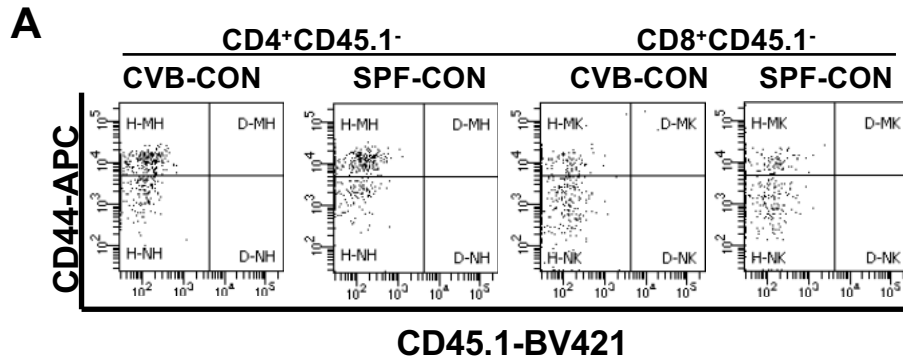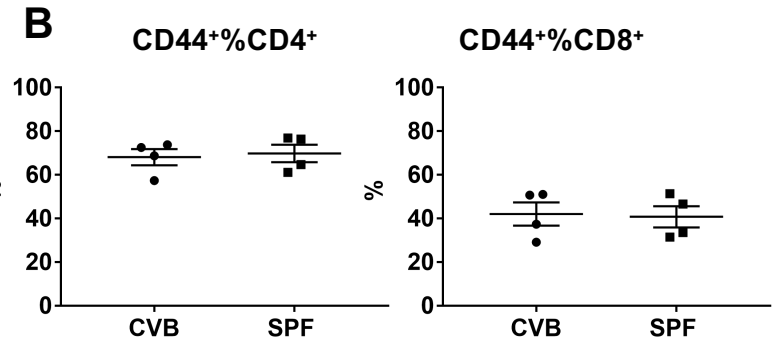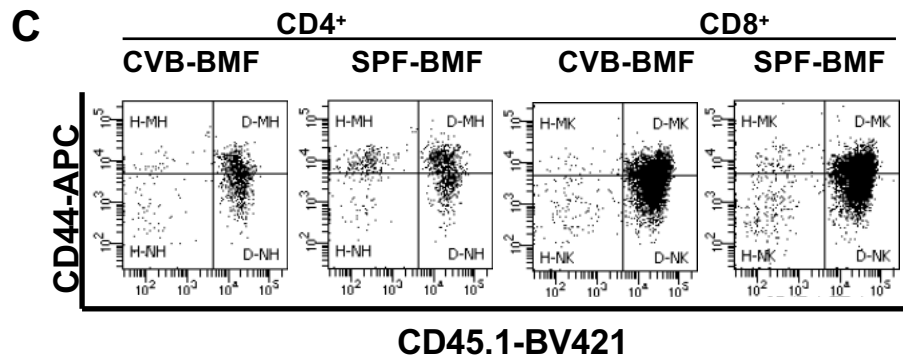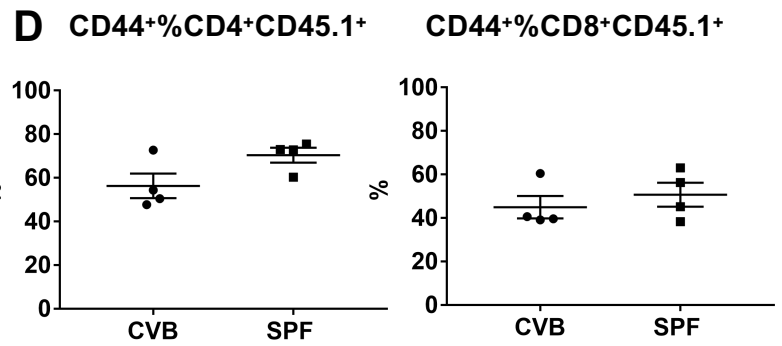

Supplement: NIHMS1064648-supplement-Supp_figS2.pdf [file NIHMS1064648-supplement-Supp_figS2.pdf]
